# Supplementary material for: Characterization of Microsatellite Distribution in Siamese Fighting Fish Genome to Promote Conservation and Genetic Diversity
Source: MDPI journal article supplement (doi:10.3390/fishes7050251), 2022-09-22
Supplement: s1 [file s1]

**Supplementary Table S1.** Details of primers used in this study.

| Locus       | Primer sequence (5' to 3')                          | Repeat              | PCR product size (bp) | Chromosome | Gene                      | Genomic region          | Gene function                                                                                                                                                                                                                                                                                                                                                                | Reference                                                                                                                 |
|-------------|-----------------------------------------------------|---------------------|-----------------------|------------|---------------------------|-------------------------|------------------------------------------------------------------------------------------------------------------------------------------------------------------------------------------------------------------------------------------------------------------------------------------------------------------------------------------------------------------------------|---------------------------------------------------------------------------------------------------------------------------|
| BettaMS1.1  | F: CGTTCATTCCACTGGATCA<br>R: AAGAGCTGGGGAAGTCCACT   | (GT) <sub>n</sub>   | 378                   | 1          | <i>bnc2</i>               | intron                  | <ul style="list-style-type: none"> <li>DNA-binding transcription factor activity</li> <li>developmental pigmentation</li> <li>pronephric nephron tubule development</li> <li>regulation of transcription, DNA-templated</li> </ul>                                                                                                                                           | Gaudet <i>et al.</i> , 2011; Patterson <i>et al.</i> , 2013; Kolvenbach <i>et al.</i> , 2019; Gaudet <i>et al.</i> , 2011 |
| BettaMS2.1  | F: GGGACATCAAACGAGAAGGA<br>R: CTCCCAGCTCAAACCACACT  | (CA) <sub>n</sub>   | 303,305               | 10         | LOC114864202 <sup>1</sup> | intron                  | Unknow                                                                                                                                                                                                                                                                                                                                                                       | -                                                                                                                         |
| BettaMS3.1  | F: TCGCTCTTCTTTATCGCTCA<br>R: GGACGTAGCCATACCTA     | (TC) <sub>n</sub>   | 394                   | 4          | <i>dab1a</i>              | between intron and exon | <ul style="list-style-type: none"> <li>lateral motor column neuron migration</li> <li>ventral spinal cord development</li> </ul>                                                                                                                                                                                                                                             | Gaudet <i>et al.</i> , 2011                                                                                               |
| BettaMS4.1  | F: GTGGACGAGAGTCTGACTGAAT<br>R: GTGTAACGGCCCCAGGTTA | (TTAA) <sub>n</sub> | 310                   | 19         | <i>inpp4aa</i>            | between intron and exon | <ul style="list-style-type: none"> <li>phosphatidylinositol-3,4-bisphosphate 4-phosphatase activity</li> </ul>                                                                                                                                                                                                                                                               | Gaudet <i>et al.</i> , 2011                                                                                               |
| BettaMS5.1  | F: AGAATGGGCTGCAGTAGACG<br>R: TTCAGCCTGTGTTTGCTCTG  | (AC) <sub>n</sub>   | 345                   | 3          | <i>gse1</i>               | intron                  | <ul style="list-style-type: none"> <li>protein binding</li> </ul>                                                                                                                                                                                                                                                                                                            | Rual <i>et al.</i> , 2015                                                                                                 |
| BettaMS6.1  | F: TTCAGCCTGTGTTTGCTCTG<br>R: AGAATGGGCTGCAGTAGACG  | (TG) <sub>n</sub>   | 345                   | 3          | <i>gse1</i>               | intron                  | <ul style="list-style-type: none"> <li>protein binding</li> </ul>                                                                                                                                                                                                                                                                                                            | Rual <i>et al.</i> , 2015                                                                                                 |
| BettaMS7.1  | F: ACATAAACCACTGTGCAAC<br>R: GATGAAACAGCTTTCCAGCA   | (AC) <sub>n</sub>   | 367                   | 4          | Non coding gene           | -                       | -                                                                                                                                                                                                                                                                                                                                                                            | -                                                                                                                         |
| BettaMS8.1  | F: AATTCTGCATTGGATGGG<br>R: CATACTGTTAAGCCTTCGGT    | (GT) <sub>n</sub>   | 304                   | 4          | Non coding gene           | -                       | -                                                                                                                                                                                                                                                                                                                                                                            | -                                                                                                                         |
| BettaMS9.1  | F: GCTCGTCTTTAGGGGAGAGG<br>R: ACATTCAGCCGCTAGTGAGG  | (CA) <sub>n</sub>   | 345                   | 5          | <i>si:dkey-49n23.1</i>    | intron                  | <ul style="list-style-type: none"> <li>chemorepellent activity</li> <li>semaphorin receptor binding</li> <li>axon guidance</li> <li>negative chemotaxis</li> <li>negative regulation of axon extension involved in axon guidance</li> <li>neural crest cell migration</li> <li>positive regulation of cell migration</li> <li>semaphorin-plexin signaling pathway</li> </ul> | Gaudet <i>et al.</i> , 2011                                                                                               |
| BettaMS10.1 | F: TCTGAGGAAGGAGGCGATTA<br>R: GCGTGCACTGAAGCATAAAG  | (CA) <sub>n</sub>   | 300                   | 9          | <i>slc20a2</i>            | between intron and exon | <ul style="list-style-type: none"> <li>inorganic phosphate transmembrane transporter activity</li> <li>symporter activity</li> <li>phosphate ion transmembrane transport</li> </ul>                                                                                                                                                                                          | Gaudet <i>et al.</i> , 2011                                                                                               |

|              |                                                     |                       |     |    |                           |                         |                                                                                                                                                                                                              |                                                              |
|--------------|-----------------------------------------------------|-----------------------|-----|----|---------------------------|-------------------------|--------------------------------------------------------------------------------------------------------------------------------------------------------------------------------------------------------------|--------------------------------------------------------------|
| BettaMS11.1  | F: AAGACGCTCCTTCATCCTGA<br>R: CGTTCTCTCGTGTGCTGT    | (CA) <sub>n</sub>     | 385 | 1  | LOC114854497 <sup>1</sup> | intron                  | Unknow                                                                                                                                                                                                       | -                                                            |
| BettaMS12.1# | F: GCCATCAGGCAGGAGATTAC<br>R: GTTCCCTGCAGACAGAGGAG  | (TCAC) <sub>n</sub>   | 383 | 1  | <i>smox</i>               | between intron and exon | <ul style="list-style-type: none"> <li>• oxidoreductase activity</li> <li>• polyamine oxidase activity</li> <li>• hemopoiesis</li> </ul>                                                                     | Gaudet <i>et al.</i> , 2011;<br>Tijssen <i>et al.</i> , 2011 |
| BettaMS13.1  | F: GGGAGGGACGATCTCTTTTC<br>R: CCCCTACTCTGCATGCTCTC  | (CA) <sub>n</sub>     | 307 | 2  | LOC114870512 <sup>1</sup> | between intron and exon | Unknow                                                                                                                                                                                                       | -                                                            |
| BettaMS14.1  | F: GGGCTGCACCTTAAACTCAT<br>R: GTCCACTGGGCTGATGTTCT  | (TCCA) <sub>n</sub>   | 356 | 2  | LOC114850832 <sup>1</sup> | between intron and exon | Unknow                                                                                                                                                                                                       | -                                                            |
| BettaMS15.1  | F: GCTTTGAGTTGGGCTCAG<br>R: TCCTCCGTGGACCTGACTAC    | (CCAGCT) <sub>n</sub> | 340 | 3  | Non coding gene           | -                       | -                                                                                                                                                                                                            | -                                                            |
| BettaMS16.1  | F: CACCTACAACCAGCAGCAGA<br>R: CCACCCTGTTGGTAGGACAT  | (AC) <sub>n</sub>     | 368 | 6  | LOC114856741 <sup>1</sup> | between intron and exon | Unknow                                                                                                                                                                                                       | -                                                            |
| BettaMS17.1  | F: GCGGGGTTCTGTCTCTAGTGT<br>R: AGTAGTGCAGAGGGAGTGAG | (CA) <sub>n</sub>     | 451 | 14 | Non coding gene           | -                       | -                                                                                                                                                                                                            | -                                                            |
| BettaMS18.1  | F: CCCACATGATCTCACACAC<br>R: CGTCCACATGAATGGAGAGA   | (CA) <sub>n</sub>     | 377 | 11 | <i>myclb</i>              | intron                  | <ul style="list-style-type: none"> <li>• DNA binding</li> <li>• DNA-binding transcription factor activity</li> <li>• protein dimerization activity</li> <li>• developmental process</li> </ul>               | Gaudet <i>et al.</i> , 2011                                  |
| BettaMS19.1  | F: GGCTGACCACACAAGTATGC<br>R: AGGCTGTGGTTGAAGTTGCT  | (TAGA) <sub>n</sub>   | 378 | 5  | <i>magilb</i>             | intron                  | <ul style="list-style-type: none"> <li>• molecular adaptor activity</li> <li>• signal transduction</li> </ul>                                                                                                | Gaudet <i>et al.</i> , 2011                                  |
| BettaMS20.1  | F: AGCGGCTGATTTCAAACATA<br>R: GGGACTGGGAGATGAATGAA  | (TCAC) <sub>n</sub>   | 326 | 21 | <i>znf292b</i>            | between intron and exon | <ul style="list-style-type: none"> <li>• DNA binding</li> <li>• DNA-binding transcription factor activity, RNA polymerase II-specific</li> <li>• regulation of transcription by RNA polymerase II</li> </ul> | Gaudet <i>et al.</i> , 2011                                  |
| BettaMS1.2   | F: CGACGAGGCTGTGAAATACA<br>R: AGCAGGTAAGTGGCAACC    | (CA) <sub>n</sub>     | 170 | 10 | Non coding gene           | -                       | -                                                                                                                                                                                                            | -                                                            |

|                 |                                                    |                   |     |    |                  |                         |                                                                                                                                                                                                                                                                                                                                                                                                                                           |                                                             |
|-----------------|----------------------------------------------------|-------------------|-----|----|------------------|-------------------------|-------------------------------------------------------------------------------------------------------------------------------------------------------------------------------------------------------------------------------------------------------------------------------------------------------------------------------------------------------------------------------------------------------------------------------------------|-------------------------------------------------------------|
| BettaMS2.2      | F: ATTCTTTCTGCCGTAA<br>R: AAAGAGGGCACTAAGCCA       | (TG) <sub>n</sub> | 200 | 20 | <i>meis2a</i>    | intron                  | <ul style="list-style-type: none"> <li>DNA binding</li> <li>animal organ morphogenesis</li> <li>brain development</li> <li>embryonic pattern specification</li> <li>embryonic viscerocranium morphogenesis</li> <li>eye development</li> <li>positive regulation of cell population proliferation</li> <li>positive regulation of transcription by RNA polymerase II</li> <li>regulation of transcription by RNA polymerase II</li> </ul> | Gaudet <i>et al.</i> , 2011;<br>Melvin <i>et al.</i> , 2013 |
| BettaMS3.2<br># | F: CATCCGCGTTTCGATTGAA<br>R: GTGGAAGGCCTCTCCTTGA   | (TG) <sub>n</sub> | 171 | 4  | Non coding gene  | -                       | -                                                                                                                                                                                                                                                                                                                                                                                                                                         | -                                                           |
| BettaMS4.2      | F: CCCACAAGTGAAAAAGGAT<br>R: ATGCCCTAAGTGTGTCCAG   | (CA) <sub>n</sub> | 200 | 1  | <i>prss12</i>    | intron                  | <ul style="list-style-type: none"> <li>scavenger receptor activity</li> <li>serine-type endopeptidase activity</li> <li>zymogen activation</li> </ul>                                                                                                                                                                                                                                                                                     | Gaudet <i>et al.</i> , 2011                                 |
| BettaMS5.2      | F: GGACAGATTCAGGGTTTAGG<br>R: ACCAGGTACCAGCACAACA  | (TG) <sub>n</sub> | 195 | 3  | <i>pde3b</i>     | between intron and exon | <ul style="list-style-type: none"> <li>3',5'-cyclic-AMP phosphodiesterase activity</li> <li>3',5'-cyclic-nucleotide phosphodiesterase activity</li> <li>metal ion binding</li> <li>protein kinase B binding</li> <li>negative regulation of cAMP-mediated signaling</li> <li>signal transduction</li> </ul>                                                                                                                               | Gaudet <i>et al.</i> , 2011                                 |
| BettaMS6.2      | F: CTTGGAGCCGAATGATATTG<br>R: TACCTCATTCTCCCTCCT   | (CA) <sub>n</sub> | 246 | 5  | Non coding gene  | -                       | -                                                                                                                                                                                                                                                                                                                                                                                                                                         | -                                                           |
| BettaMS7.2      | F: GCCACCTGCTTAAGATACTT<br>R: TAATCACTGCAGCCCCTCAT | (TG) <sub>n</sub> | 290 | 4  | <i>ctnnd2a</i>   | intron                  | <ul style="list-style-type: none"> <li>cadherin binding</li> <li>cell-cell adhesion</li> <li>cell-cell junction assembly</li> <li>dendritic spine morphogenesis</li> </ul>                                                                                                                                                                                                                                                                | Gaudet <i>et al.</i> , 2011                                 |
| BettaMS8.2      | F: ACCATAGTGTCAATCACCAG<br>R: TACTGTGGCTTGTTGCCT   | (CA) <sub>n</sub> | 254 | 5  | <i>prickle2b</i> | intron                  | <ul style="list-style-type: none"> <li>zinc ion binding</li> <li>cilium assembly</li> <li>Kupffer's vesicle development</li> <li>melanosome transport</li> <li>neural retina development</li> </ul>                                                                                                                                                                                                                                       | Mei <i>et al.</i> , 2014                                    |

|              |                                                     |                     |     |    |                 |        |                                                                                                                                                                                                                                                                                           |                                                                                                                           |
|--------------|-----------------------------------------------------|---------------------|-----|----|-----------------|--------|-------------------------------------------------------------------------------------------------------------------------------------------------------------------------------------------------------------------------------------------------------------------------------------------|---------------------------------------------------------------------------------------------------------------------------|
| BettaMS9.2   | F: GGCAAAATGATAGTGTGTGTC<br>R: CTGACCAGCTGGGATAGAGG | (TG) <sub>n</sub>   | 248 | 17 | Non coding gene | -      | -                                                                                                                                                                                                                                                                                         | -                                                                                                                         |
| BettaMS10.2# | F: CACAAACCCACAGACACAG<br>R: GCATGGTGTGTGGAAGA      | (AC) <sub>n</sub>   | 259 | 2  | Non coding gene | -      | -                                                                                                                                                                                                                                                                                         | -                                                                                                                         |
| BettaMS11.2  | F: GAAGCCTTTATTCTGTAGACC<br>R: CGTGTGCTGTTCTTTCGT   | (CA) <sub>n</sub>   | 250 | 13 | <i>ulk2</i>     | intron | <ul style="list-style-type: none"> <li>ATP binding</li> <li>protein serine/threonine kinase activity</li> <li>autophagosome assembly</li> <li>autophagy of mitochondrion</li> <li>axon extension</li> <li>regulation of dendrite morphogenesis</li> <li>dendrite development</li> </ul>   | Gaudet <i>et al.</i> , 2011;<br>Lee <i>et al.</i> , 2014;<br>Taylor <i>et al.</i> , 2011;<br>Colombo <i>et al.</i> , 2013 |
| BettaMS12.2  | F: AGGAAGACAGAGGACGACGA<br>R: CCCCAAGGTCCTCCTGTTAT  | (CA) <sub>n</sub>   | 251 | 10 | <i>efnb1</i>    | intron | <ul style="list-style-type: none"> <li>ephrin receptor binding</li> <li>axon guidance</li> <li>embryonic liver development</li> <li>ephrin receptor signaling pathway</li> <li>optic vesicle morphogenesis</li> </ul>                                                                     | Gaudet <i>et al.</i> , 2011;<br>Cayuso <i>et al.</i> , 2016;<br>Cavodeassi <i>et al.</i> , 2013                           |
| BettaMS13.2  | F: ATTCACCCAGCAAAGGGAAG<br>R: GGGCCACGAGATACTGTGTT  | (CA) <sub>n</sub>   | 238 | 19 | Non coding gene | -      | -                                                                                                                                                                                                                                                                                         | -                                                                                                                         |
| BettaMS14.2  | F: CCCGGTTTCTTGTCATTC<br>R: CGCTGATGGAAATTGAGT      | (TG) <sub>n</sub>   | 224 | 19 | Non coding gene | -      | -                                                                                                                                                                                                                                                                                         | -                                                                                                                         |
| BettaMS15.2  | F: TGGGATTCTTCGGAGTTGTC<br>R: TTCTTTCCAGCTTGCAATT   | (TG) <sub>n</sub>   | 257 | 9  | <i>exoc4</i>    | intron | <ul style="list-style-type: none"> <li>chemical synaptic transmission</li> <li>exocytosis</li> <li>Golgi to plasma membrane transport</li> <li>protein targeting to membrane</li> <li>vesicle docking involved in exocytosis</li> <li>vesicle tethering involved in exocytosis</li> </ul> | Gaudet <i>et al.</i> , 2011                                                                                               |
| BettaMS16.2  | F: TGGTGCTGTGGTATTCCTGA<br>R: ACTGTCAAATAGCTCATGC   | (TATC) <sub>n</sub> | 274 | 18 | Non coding gene | -      | -                                                                                                                                                                                                                                                                                         | -                                                                                                                         |

|              |                                                      |                    |     |    |                           |                         |                                                                                                                                                                                                                                                                                                                                                                                                                                                                                                                                                                                                                                                                                                                                                                                                                                                                       |                                                                                                                                                                                                                                                  |
|--------------|------------------------------------------------------|--------------------|-----|----|---------------------------|-------------------------|-----------------------------------------------------------------------------------------------------------------------------------------------------------------------------------------------------------------------------------------------------------------------------------------------------------------------------------------------------------------------------------------------------------------------------------------------------------------------------------------------------------------------------------------------------------------------------------------------------------------------------------------------------------------------------------------------------------------------------------------------------------------------------------------------------------------------------------------------------------------------|--------------------------------------------------------------------------------------------------------------------------------------------------------------------------------------------------------------------------------------------------|
| BettaMS17.2  | F: TGAACAGAACGTACCTGTCCTC<br>R: ATCAGTTGCAAGGCCAGTTT | (TG) <sub>n</sub>  | 226 | 15 | <i>cdh23</i>              | intron                  | <ul style="list-style-type: none"> <li>• cadherin binding</li> <li>• calcium ion binding</li> <li>• transmembrane transporter activity</li> <li>• auditory receptor cell development</li> <li>• hair cell differentiation</li> <li>• sensory perception of sound</li> <li>• protein localization to cilium</li> <li>• neuromast hair cell morphogenesis</li> <li>• locomotory behavior</li> <li>• inner ear receptor cell stereocilium organization</li> <li>• homophilic cell adhesion via plasma membrane adhesion molecules</li> <li>• equilibration</li> <li>• endocytosis</li> <li>• detection of mechanical stimulus involved in sensory perception of sound</li> <li>• detection of mechanical stimulus involved in sensory perception</li> <li>• cell projection organization</li> <li>• cell-cell adhesion via plasma membrane adhesion molecules</li> </ul> | Gaudet <i>et al.</i> , 2011; Hailey <i>et al.</i> , 2012; Obholzer <i>et al.</i> , 2012; Sollner <i>et al.</i> , 2004; Chou <i>et al.</i> , 2017; Blanco-Sanchez <i>et al.</i> , 2014; Obholzer <i>et al.</i> , 2012; Maeda <i>et al.</i> , 2017 |
| BettaMS18.2# | F: CGGCCTGACAGAAAACAGA<br>R: GCGGGTTTTGTGTAGTTGG     | (TG) <sub>n</sub>  | 231 | 12 | LOC114866883 <sup>1</sup> | intron                  | Unknow                                                                                                                                                                                                                                                                                                                                                                                                                                                                                                                                                                                                                                                                                                                                                                                                                                                                | -                                                                                                                                                                                                                                                |
| BettaMS19.2  | F: TGGTGCATTGGTGCATTAT<br>R: CGGAAGAACTGGAGGAAGTG    | (ATT) <sub>n</sub> | 242 | 18 | Non coding gene           | -                       | -                                                                                                                                                                                                                                                                                                                                                                                                                                                                                                                                                                                                                                                                                                                                                                                                                                                                     | -                                                                                                                                                                                                                                                |
| BettaMS20.2  | F: ACAGAAGAGTGGATGTGTGT<br>R: CGACTCCTTCACTCCTCAG    | (GT) <sub>n</sub>  | 317 | 17 | LOC114844365 <sup>1</sup> | between intron and exon | Unknow                                                                                                                                                                                                                                                                                                                                                                                                                                                                                                                                                                                                                                                                                                                                                                                                                                                                | -                                                                                                                                                                                                                                                |

<sup>1</sup>Uncharacterized gene.

## References#

1. Gaudet, P.; Livstone, M.S.; Lewis, S.E.; Thomas, P.D. Phylogenetic-based propagation of functional annotations within the Gene Ontology consortium. *Brief. Bioinform.* **2011**, *12*, 449–462. doi:10.1093/bib/bbr042.
2. Patterson, L.B.; Parichy, D.M. Interactions with iridophores and the tissue environment required for patterning melanophores and xanthophores during zebrafish adult pigment stripe formation. *PLoS Genet.* **2013**, *9*, e1003561. doi:10.1371/journal.pgen.1003561.
3. Kolvenbach, C.M.; Dworschak, G.C.; Frese, S.; Japp, A.S.; Schuster, P.; Wenzlitschke, N.; Yilmaz, Ö.; Lopes, F.M.; Pryalukhin, A.; Schierbaum, L.; et al. Rare variants in *BNC2* are implicated in autosomal-dominant congenital lower urinary-tract obstruction. *Am. J. Hum. Genet.* **2019**, *104*, 994–1006. doi:10.1016/j.ajhg.2019.03.023.
4. Rual, J.F.; Venkatesan, K.; Hao, T.; Hirozane-Kishikawa, T.; Dricot, A.; Li, N.; Berriz, G.F.; Gibbons, F.D.; Dreze, M.; Ayivi-Guedehoussou, N.; et al. Towards a proteome-scale map of the human protein-protein interaction network. *Nature* **2005**, *437*, 1173–1178. doi:10.1038/nature04209.
5. Tijssen, M.R.; Cvejic, A.; Joshi, A.; Hannah, R.L.; Ferreira, R.; Forrai, A.; Bellissimo, D.C.; Oram, S.H.; Smethurst, P.A.; Wilson, N.K.; et al. Genome-wide analysis of simultaneous GATA1/2, RUNX1, FLI1, and SCL binding in megakaryocytes identifies hematopoietic regulators. *Dev. Cell* **2011**, *20*, 597–609. doi:10.1016/j.devcel.2011.04.008.
6. Melvin, V.S.; Feng, W.; Hernandez-Lagunas, L.; Artinger, K.B.; Williams, T. A morpholino-based screen to identify novel genes involved in craniofacial morphogenesis. *Dev. Dyn.* **2013**, *242*, 817–831. doi:10.1002/dvdy.23969.
7. Mei, X.; Westfall, T.A.; Zhang, Q.; Sheffield, V.C.; Bassuk, A.G.; Slusarski, D.C. Functional characterization of Prickle2 and BBS7 identify overlapping phenotypes yet distinct mechanisms. *Dev. Biol.* **2014**, *392*, 245–255. doi:10.1016/j.ydbio.2014.05.020.
8. Lee, S.; Page-McCaw, P.; Gamse, J.T. Kctd12 and Ulk2 partner to regulate dendritogenesis and behavior in the habenular nuclei. *PLoS One* **2014**, *9*, e110280. doi:10.1371/journal.pone.0110280.
9. Taylor, R.W.; Qi, J.Y.; Talaga, A.K.; Ma, T.P.; Pan, L.; Bartholomew, C.R.; Klionsky, D.J.; Moens, C.B.; Gamse, J.T. Asymmetric inhibition of Ulk2 causes left-right differences in habenular neuropil formation. *J. Neurosci.* **2011**, *31*, 9869–9878. doi:10.1523/JNEUROSCI.0435-11.2011.
10. Colombo, A.; Palma, K.; Armijo, L.; Mione, M.; Signore, I.A.; Morales, C.; Guerrero, N.; Meynard, M.M.; Pérez, R.; Suazo, J.; et al. Daam1a mediates asymmetric habenular morphogenesis by regulating dendritic and axonal outgrowth. *Dev.* **2013**, *140*, 3997–4007. doi:10.1242/dev.091934.
11. Cayuso, J.; Dzementsei, A.; Fischer, J.C.; Karemore, G.; Caviglia, S.; Bartholdson, J.; Wright, G.J.; Ober, E.A. EphrinB1/EphB3b coordinate bidirectional epithelial-mesenchymal interactions controlling liver morphogenesis and laterality. *Dev. Cell.* **2016**, *39*, 316–328. doi:10.1016/j.devcel.2016.10.009.
12. Cavodeassi, F.; Ivanovitch, K.; Wilson, S.W. Eph/Ephrin signalling maintains eye field segregation from adjacent neural plate territories during forebrain morphogenesis. *Dev.* **2013**, *140*, 4193–4202. doi:10.1242/dev.097048.

13. Hailey, D.W.; Roberts, B.; Owens, K.N.; Stewart, A.K.; Linbo, T.; Pujol, R.; Alper, S.L.; Rubel, E.W.; Raible, D.W. Loss of Slc4a1b chloride/bicarbonate exchanger function protects mechanosensory hair cells from aminoglycoside damage in the zebrafish mutant *persephone*. *PLoS Genet.* **2012**, *8*, e1002971. doi:10.1371/journal.pgen.1002971.
14. Obholzer, N.; Swinburne, I.A.; Schwab, E.; Nechiporuk, A.V.; Nicolson, T.; Megason, S.G. Rapid positional cloning of zebrafish mutations by linkage and homozygosity mapping using whole-genome sequencing. *Dev.* **2012**, *139*, 4280–4290. doi:10.1242/dev.083931.
15. Söllner, C.; Rauch, G.J.; Siemens, J.; Geisler, R.; Schuster, S.C.; Müller, U.; Nicolson, T.; Tübingen Screen, C. Mutations in *cadherin 23* affect tip links in zebrafish sensory hair cells. *Nature* **2004**, *428*, 955–959, doi:10.1038/nature02484.
16. Chou, S.W.; Chen, Z.; Zhu, S.; Davis, R.W.; Hu, J.; Liu, L.; Fernando, C.A.; Kindig, K.; Brown, W.C.; Stepanyan, R.; et al. A molecular basis for water motion detection by the mechanosensory lateral line of zebrafish. *Nat. Commun.* **2017**, *8*, 2234. doi:10.1038/s41467-017-01604-2.
17. Blanco-Sánchez, B.; Clément, A.; Fierro, J., Jr.; Washbourne, P.; Westerfield, M. Complexes of Usher proteins preassemble at the endoplasmic reticulum and are required for trafficking and ER homeostasis. *Dis. Model. Mech.* **2014**, *7*, 547–559. doi:10.1242/dmm.014068.
18. Maeda, R.; Pacentine, I.V.; Erickson, T.; Nicolson, T. Functional analysis of the transmembrane and cytoplasmic domains of PCDH15A in zebrafish hair cells. *J. Neurosci.* **2017**, *37*, 3231–3245. doi:10.1523/JNEUROSCI.2216-16.2017.

**Supplementary Table S2.** Information on fighting fish genomes.

| Name | Organism               | Sex    | Instrument       | Strategy         | Source  | Layout | Run         |
|------|------------------------|--------|------------------|------------------|---------|--------|-------------|
| B2   | <i>Betta splendens</i> | Unknow | HiSeq X Ten      | WGS <sup>1</sup> | GENOMIC | PAIRED | ERR4790873  |
| C1   | <i>Betta splendens</i> | Unknow | HiSeq X Ten      | WGS <sup>1</sup> | GENOMIC | PAIRED | ERR4790878  |
| D1   | <i>Betta splendens</i> | Unknow | HiSeq X Ten      | WGS <sup>1</sup> | GENOMIC | PAIRED | ERR4790879  |
| D2   | <i>Betta splendens</i> | Unknow | HiSeq X Ten      | WGS <sup>1</sup> | GENOMIC | PAIRED | ERR4790875  |
| H1   | <i>Betta splendens</i> | Unknow | HiSeq X Ten      | WGS <sup>1</sup> | GENOMIC | PAIRED | ERR4790883  |
| Orn4 | <i>Betta splendens</i> | Male   | Illumina HiSeq X | WGS <sup>1</sup> | GENOMIC | PAIRED | SRR18231397 |
| Orn5 | <i>Betta splendens</i> | Male   | Illumina HiSeq X | WGS <sup>1</sup> | GENOMIC | PAIRED | SRR18231396 |
| Orn6 | <i>Betta splendens</i> | Male   | Illumina HiSeq X | WGS <sup>1</sup> | GENOMIC | PAIRED | SRR18231395 |
| Orn7 | <i>Betta splendens</i> | Male   | Illumina HiSeq X | WGS <sup>1</sup> | GENOMIC | PAIRED | SRR18231394 |
| Orn8 | <i>Betta splendens</i> | Male   | Illumina HiSeq X | WGS <sup>1</sup> | GENOMIC | PAIRED | SRR18231393 |
| Orn9 | <i>Betta splendens</i> | Male   | Illumina HiSeq X | WGS <sup>1</sup> | GENOMIC | PAIRED | SRR18231392 |
| BBE1 | <i>Betta bellica</i>   | Unknow | HiSeq X Ten      | WGS <sup>1</sup> | GENOMIC | PAIRED | ERR3904015  |
| BBE2 | <i>Betta bellica</i>   | Unknow | HiSeq X Ten      | WGS <sup>1</sup> | GENOMIC | PAIRED | ERR3904011  |
| BBR1 | <i>Betta brownorum</i> | Unknow | HiSeq X Ten      | WGS <sup>1</sup> | GENOMIC | PAIRED | ERR3904028  |
| BBR2 | <i>Betta brownorum</i> | Unknow | HiSeq X Ten      | WGS <sup>1</sup> | GENOMIC | PAIRED | ERR3904022  |
| BBU1 | <i>Betta burdigala</i> | Unknow | HiSeq X Ten      | WGS <sup>1</sup> | GENOMIC | PAIRED | ERR3904017  |
| BBU2 | <i>Betta burdigala</i> | Unknow | HiSeq X Ten      | WGS <sup>1</sup> | GENOMIC | PAIRED | ERR3904012  |
| BIM1 | <i>Betta imbellis</i>  | Unknow | HiSeq X Ten      | WGS <sup>1</sup> | GENOMIC | PAIRED | ERR4766250  |



|       |                            |        |             |                  |         |        |            |
|-------|----------------------------|--------|-------------|------------------|---------|--------|------------|
| BIM2  | <i>Betta imbellis</i>      | Unknow | HiSeq X Ten | WGS <sup>1</sup> | GENOMIC | PAIRED | ERR3332318 |
| BLI1  | <i>Betta livida</i>        | Unknow | HiSeq X Ten | WGS <sup>1</sup> | GENOMIC | PAIRED | ERR3904016 |
| BLI2  | <i>Betta livida</i>        | Unknow | HiSeq X Ten | WGS <sup>1</sup> | GENOMIC | PAIRED | ERR3904013 |
| BMA1  | <i>Betta mahachaiensis</i> | Unknow | HiSeq X Ten | WGS <sup>1</sup> | GENOMIC | PAIRED | ERR4766262 |
| BMA2  | <i>Betta mahachaiensis</i> | Unknow | HiSeq X Ten | WGS <sup>1</sup> | GENOMIC | PAIRED | ERR3904031 |
| BSM1  | <i>Betta smaragdina</i>    | Unknow | HiSeq X Ten | WGS <sup>1</sup> | GENOMIC | PAIRED | ERR3904029 |
| BSM2  | <i>Betta smaragdina</i>    | Unknow | HiSeq X Ten | WGS <sup>1</sup> | GENOMIC | PAIRED | ERR3904047 |
| BTU1  | <i>Betta tussyae</i>       | Unknow | HiSeq X Ten | WGS <sup>1</sup> | GENOMIC | PAIRED | ERR3904033 |
| BTU2  | <i>Betta tussyae</i>       | Unknow | HiSeq X Ten | WGS <sup>1</sup> | GENOMIC | PAIRED | ERR3904027 |
| BCH1  | <i>Betta channoides</i>    | Unknow | HiSeq X Ten | WGS <sup>1</sup> | GENOMIC | PAIRED | ERR3904023 |
| BCO1  | <i>Betta compuncta</i>     | Unknow | HiSeq X Ten | WGS <sup>1</sup> | GENOMIC | PAIRED | ERR3904018 |
| BHI1  | <i>Betta hipposideros</i>  | Unknow | HiSeq X Ten | WGS <sup>1</sup> | GENOMIC | PAIRED | ERR3904020 |
| BID1  | <i>Betta ideii</i>         | Unknow | HiSeq X Ten | WGS <sup>1</sup> | GENOMIC | PAIRED | ERR3904021 |
| BMAC1 | <i>Betta macrostoma</i>    | Unknow | HiSeq X Ten | WGS <sup>1</sup> | GENOMIC | PAIRED | ERR4766265 |
| BMAC2 | <i>Betta macrostoma</i>    | Unknow | HiSeq X Ten | WGS <sup>1</sup> | GENOMIC | PAIRED | ERR4766273 |
| BMAN1 | <i>Betta mandor</i>        | Unknow | HiSeq X Ten | WGS <sup>1</sup> | GENOMIC | PAIRED | ERR3904026 |
| BPU1  | <i>Betta pulchra</i>       | Unknow | HiSeq X Ten | WGS <sup>1</sup> | GENOMIC | PAIRED | ERR3904019 |
| BPU2  | <i>Betta pulchra</i>       | Unknow | HiSeq X Ten | WGS <sup>1</sup> | GENOMIC | PAIRED | ERR3904014 |
| BRU1  | <i>Betta rubra</i>         | Unknow | HiSeq X Ten | WGS <sup>1</sup> | GENOMIC | PAIRED | ERR3904024 |

---

<sup>1</sup>Whole Genome Sequencing

**Supplementary Table S7.** Descriptive statistics at microsatellite markers level based on 21 Siamese fighting fish (*Betta splendens*, Regan, 1910)

| Markers     | $N_a$ | $H_o$ | $H_e$ | $PIC$ | Source                              |
|-------------|-------|-------|-------|-------|-------------------------------------|
| BettaMS10.1 | 22    | 0.95  | 0.94  | 0.94  | This study                          |
| BettaMS14.1 | 13    | 0.24  | 0.88  | 0.87  | This study                          |
| BettaMS2.2  | 10    | 0.48  | 0.84  | 0.82  | This study                          |
| BettaMS14.2 | 1     | 0.00  | 0.00  | 0.00  | This study                          |
| BettaMS4    | 15    | 0.86  | 0.91  | 0.90  | Chailertrit<br><i>et al.</i> , 2014 |
| BettaMS5    | 14    | 0.52  | 0.91  | 0.90  | Chailertrit<br><i>et al.</i> , 2014 |
| BettaMS8    | 4     | 0.29  | 0.33  | 0.31  | Chailertrit<br><i>et al.</i> , 2014 |
| BettaMS15   | 5     | 0.57  | 0.71  | 0.66  | Chailertrit<br><i>et al.</i> , 2014 |
| BettaMS17   | 15    | 0.75  | 0.87  | 0.86  | Chailertrit<br><i>et al.</i> , 2014 |
| BettaMS23   | 12    | 0.95  | 0.87  | 0.85  | Chailertrit<br><i>et al.</i> , 2014 |
| BettaMS25   | 11    | 0.24  | 0.78  | 0.76  | Chailertrit<br><i>et al.</i> , 2014 |
| BettaMS40   | 13    | 0.38  | 0.87  | 0.86  | Chailertrit<br><i>et al.</i> , 2014 |

Number of alleles ( $N_a$ ); allelic richness ( $H_o$ ); expected heterozygosity ( $H_e$ ); polymorphic information content ( $PIC$ ).

## References

1. Regan, C.T. The Asiatic fishes of the family Anabantidae. In *Proceedings of the Zoological Society of London*, 1909; pp. 767–787.
2. Chailertrit, V.; Swatdipong, A.; Peyachoknagul, S.; Salaenoi, J.; Srikulnath, K. Isolation and characterization of novel microsatellite markers from Siamese fighting fish (*Betta splendens*, Osphronemidae, Anabantoidei) and their transferability to related species, *B. smaragdina* and *B. imbellis*. *Genet. Mol. Res.* 2014, 13, 7157–7162. doi:10.4238/2014.September.5.1.
